# Supplementary material for: The Efficacy of Probiotics, Prebiotics, and Synbiotics in Patients Who Have Undergone Abdominal Operation, in Terms of Bowel Function Post-Operatively: A Network Meta-Analysis
Source: MDPI journal article supplement (doi:10.3390/jcm12124150), 2023-06-20
Supplement: s1 [file s1]

Table S5a. GRADE evaluation for the primary outcome of post-operative ileus.

| Comparison                              | Nº of participants (studies) | Relative Risk (95% CI)   | Certainty of the evidence (GRADE) | Comments                           |
|-----------------------------------------|------------------------------|--------------------------|-----------------------------------|------------------------------------|
| Probiotics vs Placebo (direct evidence) | 217 (4 studies)              | <b>0.38 [0.14, 0.98]</b> | Low                               | Within study bias<br>Heterogeneity |
| Probiotics vs Placebo (Network MA)      |                              | <b>0.38 [0.14, 0.98]</b> | Low                               | Within study bias<br>Heterogeneity |
| Synbiotics vs Placebo (direct evidence) | 362 (1 study)                | <b>0.81 [0.31, 2.08]</b> | Moderate                          | Imprecision                        |
| Synbiotics vs Placebo (Network MA)      |                              | <b>0.81 [0.31, 2.08]</b> | Moderate                          | Imprecision                        |
| Probiotics vs Synbiotics (Network MA)   |                              | <b>0.47 [0.12, 1.79]</b> | Moderate                          | Imprecision                        |

Table S5b. GRADE evaluation for the primary outcome of time to first flatus.

| Comparison                              | Nº of participants (studies) | Mean Difference (95% CI)    | Certainty of the evidence (GRADE) | Comments                           |
|-----------------------------------------|------------------------------|-----------------------------|-----------------------------------|------------------------------------|
| Probiotics vs Placebo (direct evidence) | 521 (7 study)                | <b>-0.47 [-0.78, -0.17]</b> | Moderate                          | Within study bias                  |
| Probiotics vs Placebo (Network MA)      |                              | <b>-0.47 [-0.78, -0.17]</b> | Moderate                          | Within study bias                  |
| Synbiotics vs Placebo (direct evidence) | 180 (3 study)                | <b>-0.53 [-0.96, -0.09]</b> | Low                               | Within study bias<br>Heterogeneity |
| Synbiotics vs Placebo (Network MA)      |                              | <b>-0.53 [-0.96, -0.09]</b> | Low                               | Within study bias<br>Heterogeneity |
| Probiotics vs Synbiotics (Network MA)   |                              | <b>-0.55 [-1.69, 0.60]</b>  | Low                               | Within study bias<br>Imprecision   |
