# Supplementary material for: The Efficacy of Probiotics, Prebiotics, and Synbiotics in Patients Who Have Undergone Abdominal Operation, in Terms of Bowel Function Post-Operatively: A Network Meta-Analysis
Source: MDPI journal article supplement (doi:10.3390/jcm12124150), 2023-06-20
Supplement: s1 [file s1]

**Supplementary Table S3: Characteristics of eligible studies**

**Probiotics**

| Study             | Type of study | Sample         | Age | Male | Primary Disease/Condition                    | Type of surgery                     | Intervention group                                                                                                                                                                                                                                                 | Control group   | Treated days (pre + post-surgery)               | Outcome     |
|-------------------|---------------|----------------|-----|------|----------------------------------------------|-------------------------------------|--------------------------------------------------------------------------------------------------------------------------------------------------------------------------------------------------------------------------------------------------------------------|-----------------|-------------------------------------------------|-------------|
| Liu, 2010         | DB, RCT       | I: 50<br>C: 50 | 69  | 66   | Colorectal cancer                            | Radical colectomy                   | Encapsulated bacteria containing Lactobacillus plantarum (CGMCC No. 1258, cell count $10^{11}$ CFU/g), Lactobacillus acidophilus (LA-11, cell count $7.0 \times 10^{10}$ CFU/g) and Bifidobacterium longum (BL-88, cell count $5.0 \times 10^{10}$ CFU/g), 2 g/day | Placebo         | 6 days preoperative + postoperative day 1–10    | TD, AD, LOP |
| Diepenhorst, 2010 | RCT           | I: 10<br>C: 10 | 64  | 10   | Periampullary or ampullary pancreatic cancer | PD                                  | Ecologic641 consisting of six probiotic strains (3g twice a day)                                                                                                                                                                                                   | No intervention | 7 days preoperative + postoperative 1-7         | PI          |
| Zhang, 2012       | DB, RCT       | I: 30<br>C: 30 | 65  | 24   | Colorectal cancer                            | Radical colectomy                   | Bifid triple viable capsules, each of which contained 0.21 g ( $10^8$ CFU/g) of B longum, L acidophilus and Enterococcus faecalis (one capsule 3 times a day).                                                                                                     | Placebo         | 3-5 days preoperative                           | PI          |
| Mangell, 2012     | DB, RCT       | I: 32<br>C: 32 | 72  | 36   | Colorectal cancer                            | Colon resection                     | Daily consumption of $10^{11}$ CFU of Lp 299v                                                                                                                                                                                                                      | Placebo         | 8 days preoperative + postoperative 1-5         | TD, TF      |
| Chen, 2014        | DB, RCT       | I: 35<br>C: 35 | N   | N    | Colorectal cancer                            | Radical colectomy                   | Probiotics preparation consisting of two combined live bacteria                                                                                                                                                                                                    | Placebo         | 5 days preoperative + postoperative day 1–7     | TD, TF, AD  |
| Liu, 2015         | DB, RCT       | I: 66<br>C: 68 | 63  | 70   | Colorectal liver metastases                  | Colorectal liver metastases surgery | Encapsulated admixture of three probiotics bacteria, composed of LP (CGMCC No.1258, cell count $\geq 10^{11}$ CFU/g), LA-11 (cell count $\geq 7.0 \times 10^{10}$ CFU/g) and BL-88 (cell count $\geq 5.0 \times 10^{10}$ CFU/g) (2 g a day)                        | Placebo         | 6 days preoperative + postoperative day 1–10    | AD, LOP, TD |
| Mizuta, 2015      | RCT           | I: 31<br>C: 29 | 70  | 35   | Colorectal cancer                            | Colorectal cancer resection         | A sachet containing 2 g of B. longum BB536 powder (approximately $5 \times 10^{10}$ colony-forming units/2 g) daily                                                                                                                                                | SC              | 7-14 days preoperative + postoperative day 1–14 | LOP         |
| Kotzampassi 2015  | DB, RCT       | I: 84<br>C: 80 | 66  | 115  | Colorectal cancer                            | Colon resection                     | Lactobacillus acidophilus LA-5 $1.75 \times 10^9$ CFU, Lactobacillus plantarum $0.5 \times 10^9$ CFU, Bifidobacterium lactis BB-12 $1.75 \times 10^9$ CFU and Saccharomyces boulardii $1.5 \times 10^9$ CFU per capsule                                            | Placebo         | postoperative day 1–14                          | LOP, TD     |

|                  |         |                |    |    |                                            |                                                                          |                                                                                                                                                                                                                                                                                                                                                                                                      |                    |                                                        |                 |
|------------------|---------|----------------|----|----|--------------------------------------------|--------------------------------------------------------------------------|------------------------------------------------------------------------------------------------------------------------------------------------------------------------------------------------------------------------------------------------------------------------------------------------------------------------------------------------------------------------------------------------------|--------------------|--------------------------------------------------------|-----------------|
| Consoli, 2015    | RCT     | I: 15<br>C: 18 | 55 | 15 | Colorectal cancer,<br>other diseases       | Elective colon resection                                                 | Once-daily oral lyophilized yeast capsule with 100 mg<br>( $0.5 \times 10^9$ CGU/g) of <i>S. boulardii</i> (Merck S.A.,<br>Biocodex, France).                                                                                                                                                                                                                                                        | No<br>intervention | 1-7 days<br>preoperative                               | LOP             |
| Yang, 2016       | DB, RCT | I: 30<br>C: 30 | 63 | 27 | Colorectal Cancer                          | Colorectal cancer surgery                                                | Combined probiotics containing<br><i>Bifidobacterium longum</i> ( $\geq 1.0 \times 10^7$ CFU/g),<br><i>Lactobacillus acidophilus</i> ( $\geq 1.0 \times 10^7$ CFU/g), and<br><i>Enterococcus faecalis</i> ( $\geq 1.0 \times 10^7$ CFU/g) (2g, 3 times<br>a day)                                                                                                                                     | Placebo            | 5 days preoperative<br>+ postoperative<br>day 1–7      | TF, TD, LOP, AB |
| Tan, 2016        | DB, RCT | I: 20<br>C: 20 | 66 | 24 | Colorectal Cancer                          | Colorectal cancer surgery                                                | An orange-flavored granular powder, containing 30<br>billion colony-forming units of highly compatible, acid-<br>and bile-resistant strains of <i>Lactobacillus acidophilus</i> ,<br><i>Lactobacillus casei</i> , <i>Lactobacillus lactis</i> ,<br><i>Bifidobacterium bifidum</i> , <i>Bifidobacterium longum</i> , and<br><i>Bifidobacterium infantis</i> (twice daily)                             | Placebo            | 7 days preoperative                                    | LOP             |
| Xie, 2018        | RCT     | I: 70<br>C: 70 | 68 | 67 | Gastric cancer                             | Distal gastrectomy                                                       | Probiotics three times a day                                                                                                                                                                                                                                                                                                                                                                         | SC                 | Postoperative day<br>1–8                               | TF, LOP         |
| Xu, 2018         | RCT     | I: 30<br>C: 30 | 62 | 38 | Colorectal cancer                          | Colorectal cancer surgery                                                | <i>Bifidus</i> -triple viable preparation daily                                                                                                                                                                                                                                                                                                                                                      | SC                 | Postoperative day<br>1–7                               | TF              |
| Bajramagic, 2019 | RCT     | I: 39<br>C: 39 | N  | N  | Colorectal cancer                          | Colorectal cancer surgery                                                | Probiotic capsules contain eight bacterial cultures<br>( <i>Lactobacillus acidophilus</i> , <i>Lactobacillus casei</i> ,<br><i>Lactobacillus plantarum</i> , <i>Lactobacillus rhamnosus</i> ,<br><i>Bifidobacterium lactis</i> , <i>Bifidobacterium bifidum</i> ,<br><i>Bifidobacterium breve</i> , <i>Streptococcus thermophilus</i> )<br>(one capsule twice daily)                                 | SC                 | Postoperative day<br>3–30                              | PI              |
| Park, 2020       | DB, RCT | I: 29<br>C: 30 | 61 | 32 | Colorectal cancer                          | Colorectal cancer surgery                                                | Two g probiotic powder contained three probiotic<br>strains (twice daily)                                                                                                                                                                                                                                                                                                                            | Placebo            | 7 days preoperative<br>+ postoperative<br>day 1–21     | PI              |
| Zeng, 2020       | RCT     | I: 54<br>C: 53 | 56 | 71 | Gastric cancer                             | Gastrectomy                                                              | <i>Bifid</i> triple viable (0.42-0.84g twice daily)                                                                                                                                                                                                                                                                                                                                                  | SC                 | Postoperative day<br>1–7                               | TF, TD          |
| Yoon, 2020       | DB, RCT | I: 19<br>C: 17 | 60 | 23 | Rectal cancer                              | Ileostomy reversal                                                       | Three-week course of probiotics at a dose of $1 \times 10^{10}$<br>lactic acid bacteria ( <i>Lactobacillus plantarum</i> ) one sachet<br>per day orally. Only one day before the operation, the<br>patients received two sachets.                                                                                                                                                                    | Placebo            | 21 days<br>preoperative+ 21<br>days postoperative      | TF, TD          |
| Fowarski, 2021   | RCT     | I: 20<br>C: 20 | N  | 25 | Pancreatic cancer/<br>Chronic Pancreatitis | Pylorus-preserving<br>Longmire-Traverso PD<br>with pancreateojejunostomy | <i>L. rhamnosus</i> GG- one capsule containing 6 million<br>CFU of this PB strain every 12 hours from the day of<br>the surgery for 30 days                                                                                                                                                                                                                                                          | SC                 | Day of surgery +<br>postoperative day<br>1–30          | TF, TD, LOP     |
| Wang, 2021       | DB, RCT | I: 26<br>C: 25 | 70 | N  | Colorectal Cancer                          | Colorectal cancer surgery                                                | Probiotic capsules (0.84 g) twice daily from admission<br>until discharge. The probiotic capsule (BIFICO, Sine<br>Pharmaceuticals, Shanghai, China) contained <i>Bi fi</i><br><i>dobacterium longum</i> ( $\geq 1.0 \times 10^7$ CFU/capsule),<br><i>Lactobacillus acidophilus</i> ( $\geq 1.0 \times 10^7$ CFU/capsule),<br>and <i>Enterococcus faecalis</i> ( $\geq 1.0 \times 10^7$ CFU/capsule). | Placebo            | 3-5 days<br>preoperative +<br>Postoperative day<br>1–7 | TF, TD, LOP     |

## Synbiotics

| Study          | Type of study | Sample         | Age | Male | Primary Disease                            | Type of surgery                                                              | Intervention group                                                                                                                                                                                                                                                                                                                                                                                                                                                                                                                                                 | Control group                | Treated days (pre + post-surgery)         | Outcome |
|----------------|---------------|----------------|-----|------|--------------------------------------------|------------------------------------------------------------------------------|--------------------------------------------------------------------------------------------------------------------------------------------------------------------------------------------------------------------------------------------------------------------------------------------------------------------------------------------------------------------------------------------------------------------------------------------------------------------------------------------------------------------------------------------------------------------|------------------------------|-------------------------------------------|---------|
| Rayes, 2002    | RCT           | I: 30<br>C: 30 | 61  | 30   | Abdominal disease                          | Major abdominal surgery                                                      | Lactobacillus plantarum 299 in a dose of $10^9$ and oat fiber twice daily through the feeding tube during the first 4 days.                                                                                                                                                                                                                                                                                                                                                                                                                                        | Placebo                      | Postoperative day 1–5                     | LOP     |
| Rayes, 2002    | RCT           | I: 31<br>C: 32 | 50  | 30   | Liver disease                              | Liver transplantation                                                        | Lactobacillus plantarum 299 (AB Probi, Lund, Sweden) in a dose of $10^9$ and oat fiber were added twice daily via the feeding tube.                                                                                                                                                                                                                                                                                                                                                                                                                                | Placebo                      | Postoperative day 1–12                    | LOP     |
| Rayes, 2005    | DB, RCT       | I: 33<br>C: 33 | 51  | 38   | Cirrhosis                                  | Liver transplantation                                                        | Synbiotic composition of pre- and probiotics was administered twice daily via the feeding tube or orally. Each dose of the combination contains four different LAB: 10 10 Pediacoccus pentosaceus 5-33:3 (dep. no. LMG P-20608), Leuconostoc mesenteroides 77:1 (dep. no. LMG P-20607), Lactobacillus paracasei ssp. paracasei F19 (dep. no. LMG P-17806) and L. plantarum 2362 (dep. no. LMG P-20606) plus four bioactive fibers: 2.5 g of each betaglucan, inulin, pectin and resistant starch, totally 10 g/dose, or 20 g/day.                                  | PRE (Four bioactive fibers)) | Postoperative day 1–14                    | LOP     |
| Kanazawa, 2005 | RCT           | I: 21<br>C: 23 | 64  | 29   | Biliary cancer                             | Combined liver and extrahepatic bile duct resection with hepaticojejunostomy | Yakult BL Seichōyaku (3 g/day) and GOS (12 g/day). Yakult BL Seichōyaku contains: $1 \times 10^8$ living Bifidobacterium breve strain Yakult and $1 \times 10^8$ living Lactobacillus casei strain Shirota/g                                                                                                                                                                                                                                                                                                                                                       | SC                           | Postoperative day 1–14                    | LOP     |
| Rayes, 2007    | DB, RCT       | I: 40<br>C: 40 | 58  | 45   | Pancreatic cancer/<br>Chronic Pancreatitis | Pylorus-preserving PD                                                        | Synbiotic composition of pre- and probiotics was administered twice daily via the feeding tube or orally. Each dose of the combination contains 4 different lactic acid bacteria: $10^{10}$ Pediacoccus pentosaceus 5–33:3 (dep.nr LMG P-20608), Leuconostoc mesenteroides 77:1 (dep.nr LMG P-20607), Lactobacillus paracasei subspecies paracasei F19 (dep.nr LMG P-17806), and Lactobacillus plantarum 2362 (dep.nr LMG P-20606) plus 4 bioactive fibers: 2.5 g of each betaglucan, inulin, pectin, and resistant starch, totally 10 g per dose, or 20 g per day | PRE (Four bioactive fibers)  | 1 day preoperative + postoperative day1-8 | LOP,AD  |

|                  |         |                           |    |    |                                    |                                   |                                                                                                                                                                                                                                                                                                                                                                                                                                                                                                                                                                                  |               |                                               |            |
|------------------|---------|---------------------------|----|----|------------------------------------|-----------------------------------|----------------------------------------------------------------------------------------------------------------------------------------------------------------------------------------------------------------------------------------------------------------------------------------------------------------------------------------------------------------------------------------------------------------------------------------------------------------------------------------------------------------------------------------------------------------------------------|---------------|-----------------------------------------------|------------|
| Usami, 2010      | RCT     | I: 32<br>C: 29            | 66 | 55 | Primary or metastatic liver cancer | Liver resection                   | Yakult BL Seichōyaku (3 g/day) and GOS (10g/day).<br>Yakult BL Seichōyaku contains: $1 \times 10^8$ living Bifidobacterium breve strain Yakult and $1 \times 10^8$ living Lactobacillus casei strain Shirota/g.                                                                                                                                                                                                                                                                                                                                                                  | SC            | 14 days preoperative + postoperative day 3–14 | LOP        |
| Horvat, 2010     | DB, RCT | I: 20<br>PRE: 28<br>C: 20 | 63 | 30 | Colorectal cancer                  | Elective colorectal               | Combination of pro- and prebiotics was the multi-strain/ multi-fiber Synbiotic 2000™, four lactobacilli, one from each of four main genera: $10^{10}$ of Pediacoccus pentosaceus 5-33:3, $10^{10}$ of Leuconostoc mesenteroides 32–77:1, $10^{10}$ of Lactobacillus paracasei subsp. paracasei 19 and $10^{10}$ of Lactobacillus plantarum 2362. Each dose thus contains a total of 40 billion lactobacilli plus 10 g of well-studied bioactive plant fibers (2.5 g betaglucan, 2.5 g inulin, 2.5 g pectin, 2.5 g resistant starch) packed in sachets that are mixed with water. | Placebo & PRE | 1-3 day preoperative                          | TF, LOP    |
| Tanaka, 2012     | RCT     | I: 30<br>C: 34            | 62 | 51 | Esophageal cancer                  | Esophagectomy                     | Yakult BL Seichōyaku (3 g/day) and GOS (15g/day).<br>Yakult BL Seichōyaku contains: $1 \times 10^8$ living Bifidobacterium breve strain Yakult and $1 \times 10^8$ living Lactobacillus casei strain Shirota/g.                                                                                                                                                                                                                                                                                                                                                                  | SC            | Postoperative day 1–21                        | TD, TF     |
| Russolillo, 2014 | RCT     | I: 20<br>C: 20            | 63 | 24 | Hepato-biliary pancreatic cancer   | Hepato-biliary pancreatic surgery | Prebiotic (Mediabase srl., Prato, Italy) in a dose of one sachet twice a day for at least 1 week preoperatively. Postoperatively, the medication was reintroduced as tolerated and continued until discharge from hospital. One 4.5 gr sachet of Prebiotic contains at least $10^{10}$ living Bifidobacterium bifidum, $10^{10}$ living Streptococcus thermophilus, $10^{10}$ living Streptococcus salivarius, $3 \times 10^9$ Lactobacillus acidophilus, $10^{10}$ living Lactobacillus casei, $10^{10}$ living Lactobacillus bulgaricus and galacto-oligosaccharides (4.5g).   | SC            | 7 day preoperative + until discharge          | LOP        |
| Krebs, 2015      | DB, RCT | I: 20<br>C: 16            | 66 | 22 | Colorectal cancer                  | Colorectal surgery                | One sachet consists $10^{11}$ of each of four LAB: Pediacoccus pentosaceus 5–33:3, Leuconostoc mesenteroides 32–77:1, Lactobacillus paracasei subsp paracasei 19, and Lactobacillus plantarum 2362. This makes 400 billion LAB per dose. Also included in the sachet is 2.5 g of each of the four fermentable fibres (one sachet twice a day)                                                                                                                                                                                                                                    | Placebo       | 1-3 days preoperative                         | TD, TF, DS |
| Yokoyama, 2014   | RCT     | I: 21<br>C: 21            | 66 | 37 | Oesophageal cancer                 | Oesophagectomy                    | One 80-ml bottle of Yakult 400, which contained at least $4 \times 10^{10}$ living Lactobacillus casei strain Shirota; one 100-ml bottle of MILMIL-S, which contained at least $1 \times 10^{10}$ living Bifidobacterium breve strain Yakult; and 15 g GOS (Daily)                                                                                                                                                                                                                                                                                                               | SC            | 7 days preoperative + postoperative day 1–14  | LOP        |

|                  |         |                  |    |     |                                                 |                           |                                                                                                                                                                                                                                                                                                                                                             |         |                                                         |             |
|------------------|---------|------------------|----|-----|-------------------------------------------------|---------------------------|-------------------------------------------------------------------------------------------------------------------------------------------------------------------------------------------------------------------------------------------------------------------------------------------------------------------------------------------------------------|---------|---------------------------------------------------------|-------------|
| Komatsu, 2015    | RCT     | I: 168<br>C: 194 | 67 | 210 | Colorectal cancer                               | Colorectal surgery        | One 80-ml bottle of Yakult Ace, which contained at least $4 \times 10^{10}$ living <i>Lactobacillus casei</i> strain Shirota with 2.5 g GOS; and one 100-ml bottle of MILMIL-S, which contained at least $1 \times 10^{10}$ living <i>Bifidobacterium breve</i> strain Yakult (Daily)                                                                       | SC      | 7-11 days<br>preoperative +<br>postoperative day<br>2-7 | PI          |
| Sommecal, 2015   | DB, RCT | I: 23<br>C: 23   | 60 | N   | Periampullary cancer                            | PD                        | <i>Lactobacillus acidophilus</i> 10, $1 \times 10^9$ CFU, <i>Lactobacillus rhamnosus</i> HS 111, $1 \times 10^9$ CFU, <i>Lactobacillus casei</i> 10, $1 \times 10^9$ CFU, <i>Bifidobacterium bifidum</i> , $1 \times 10^9$ CFU + fructooligosaccharides 100 mg (twice daily)                                                                                | Placebo | 4 days<br>preoperative +<br>postoperative day<br>1-10   | LOP         |
| Rammohan, 2015   | RCT     | I: 39<br>C: 36   | 43 | 48  | Chronic pancreatitis                            | Frey procedure            | Specific composition of prebiotics and probiotics (synbiotics) [ <i>Streptococcus faecalis</i> T-110-60 million, <i>Clostridium butyricum</i> TOA-4 million, <i>Bacillus mesentericus</i> TO-A-2 million, <i>Lactobacillus sporogenes</i> -100 million, Fructooligosaccharides ( <i>Bifiliac</i> HP, Tablets, India)] was administered thrice daily orally. | Placebo | 5 days<br>preoperative +<br>postoperative day<br>1-10   | LOP         |
| Yokoyama, 2016   | RCT     | I: 22<br>C: 22   | 65 | 12  | Biliary pancreatic cancer, Chronic pancreatitis | PD                        | 80-ml bottle of Yakult 400 (Yakult Honsha, Tokyo, Japan), which contained $4 \times 10^{10}$ living <i>Lactobacillus casei</i> strain Shirota; one 100-ml bottle of MILMIL S (Yakult Honsha), which contained $1 \times 10^{10}$ living <i>Bifidobacterium breve</i> strain Yakult; and 15 g of galacto-oligosaccharides (Oligomate S-HP; Yakult Honsha)    | SC      | 7 days<br>preoperative +<br>postoperative day<br>1-14   | LOP         |
| Flesch, 2017     | DB, RCT | I: 49<br>C: 42   | 62 | 37  | Colorectal cancer                               | Colorectal cancer surgery | Two sachets twice a day <i>L. bacillus acidophilus</i> NCFM ( $10^9$ ), <i>Lactobacillus rhamnosus</i> HN001 ( $10^9$ ), <i>Lactobacillus paracasei</i> LPC-37 ( $10^9$ ), <i>Bifidobacterium lactis</i> HN019 ( $10^9$ ) and fructo -oligosaccharides (FOS) 6g.                                                                                            | Placebo | 5 days<br>preoperative +<br>postoperative day<br>1-14   | LOP         |
| Zhao, 2017       | RCT     | I: 40<br>C: 40   | 65 | 38  | Gastric cancer                                  | Gastrectomy               | Six g of live <i>bifidobacterium</i> and <i>lactobacillus</i> in tablets, 30 g of Shen Jia (daily).                                                                                                                                                                                                                                                         | SC      | postoperative day<br>1-7                                | TF, AD, LOP |
| Polakowski, 2018 | DB, RCT | I: 36<br>C: 37   | 60 | 39  | Colorectal cancer                               | Colorectal cancer surgery | Simbioflora, a dietary supplement comprising 6g of fructooligosaccharide, and the probiotics <i>Lactobacillus acidophilus</i> NCFM, <i>Lactobacillus rhamnosus</i> HN001, <i>Lactobacillus casei</i> LPC-37 and <i>Bifidobacterium lactis</i> HN019 in the concentration of $10^9$ (6g twice daily)                                                         | Placebo | 1-7 days<br>preoperative                                | LOP         |

CFU, colony forming units; C, Control group; DB, Double blind; I, Intervention group; GOS, galacto-oligosaccharides; PD, pancreatoduodenectomy N; not available; RCT, randomized controlled trial; SC, standard care; TF, time to first flatus; TD: time to first defecation; LOP: Length of postoperative hospital stay; PI: Postoperative ileus; AD; abdominal distension; Prebiotics; PRE.
