# Supplementary material for: The Efficacy of Probiotics, Prebiotics, and Synbiotics in Patients Who Have Undergone Abdominal Operation, in Terms of Bowel Function Post-Operatively: A Network Meta-Analysis
Source: MDPI journal article supplement (doi:10.3390/jcm12124150), 2023-06-20
Supplement: s1 [file s1]

**Supplementary Table S1. Electronic search strategy**

| Database                                | Search term (last search 17.3.2023)                                               | Number      |
|-----------------------------------------|-----------------------------------------------------------------------------------|-------------|
| PubMed<br>(All fields)                  | #1: synbiotics OR prebiotic OR probiotics OR probiotic OR prebiotics OR synbiotic | #1: 50244   |
|                                         | #2: operation OR surgery                                                          | #2: 6171562 |
|                                         | #3: gastrointestinal OR abdominal OR colorectal OR pancreatic OR laparotomy       | #3: 1519369 |
|                                         | #4: #1 AND #2 AND #3                                                              | #4: 1506    |
| Embase<br>(All fields)                  | #1: synbiotics OR prebiotic OR probiotics OR probiotic OR prebiotics OR synbiotic | #1: 70802   |
|                                         | #2: operation OR surgery                                                          | #2: 8095628 |
|                                         | #3: gastrointestinal OR abdominal OR colorectal OR pancreatic OR laparotomy       | #3: 2167303 |
|                                         | #4: #1 AND #2 AND #3                                                              | #4: 3102    |
| Cochrane Library Trials<br>(All fields) | #1: synbiotics OR prebiotic OR probiotics OR probiotic OR prebiotics OR synbiotic | #1: 10692   |
|                                         | #2: operation OR surgery                                                          | #2: 337993  |
|                                         | #3: gastrointestinal OR abdominal OR colorectal OR pancreatic OR laparotomy       | #3: 131604  |
|                                         | #4: #1 AND #2 AND #3                                                              | #4: 448     |
| Scopus<br>(All fields)                  | #1: synbiotics OR prebiotic OR probiotics OR probiotic OR prebiotics OR synbiotic | #1: 86976   |
|                                         | #2: operation OR surgery                                                          | #2: 5073148 |
|                                         | #3: gastrointestinal OR abdominal OR colorectal OR pancreatic OR laparotomy       | #3: 1812915 |
|                                         | #4: #1 AND #2 AND #3                                                              | #4: 1064    |
