# Supplementary material for: The Efficacy of Probiotics, Prebiotics, and Synbiotics in Patients Who Have Undergone Abdominal Operation, in Terms of Bowel Function Post-Operatively: A Network Meta-Analysis
Source: MDPI journal article supplement (doi:10.3390/jcm12124150), 2023-06-20
Supplement: s1 [file s1]

|                    | D1 | D2 | D3 | D4 | D5 | Overall |
|--------------------|----|----|----|----|----|---------|
| Rayes 2002         | +  | +  | +  | ?  | +  | ?       |
| Rayes (Liver) 2002 | +  | +  | ×  | ?  | +  | ×       |
| Rayes 2005         | ?  | +  | +  | +  | +  | ?       |
| Kanazawa 2005      | ×  | ?  | +  | +  | +  | ×       |
| Rayes 2007         | +  | +  | +  | +  | +  | +       |
| Usami 2010         | +  | ?  | +  | +  | +  | ?       |
| Liu 2010           | +  | +  | +  | +  | +  | +       |
| Diepenhorst 2010   | +  | ?  | +  | +  | +  | ?       |
| Horvat 2010        | +  | +  | +  | +  | +  | +       |
| Tanaka 2012        | ×  | ?  | +  | +  | +  | ×       |
| Zhang 2012         | ×  | ?  | +  | +  | +  | ×       |
| Mangell 2012       | +  | +  | ×  | +  | +  | ×       |
| Russolillo 2014    | +  | +  | ×  | ?  | +  | ×       |
| Chen 2014          | ×  | +  | +  | +  | +  | ×       |
| Yokoyama 2014      | ×  | ?  | +  | +  | +  | ×       |
| Sommacal 2015      | +  | +  | +  | +  | +  | +       |
| Komatsu 2014       | +  | ?  | +  | +  | +  | ?       |
| Rammohan 2015      | +  | +  | ?  | ?  | +  | ?       |
| Kotzampassi 2015   | +  | +  | +  | +  | ?  | ?       |
| Liu 2015           | +  | ?  | +  | +  | +  | ?       |
| Mizuta 2015        | ×  | ?  | +  | +  | +  | ×       |
| Consoli 2015       | +  | ?  | +  | +  | +  | ?       |
| Krebs 2015         | +  | ?  | +  | +  | +  | ?       |
| Yang 2016          | +  | ?  | +  | +  | +  | ?       |
| Tan 2016           | +  | +  | +  | +  | +  | +       |
| Yokoyama 2016      | +  | ×  | +  | +  | +  | ×       |
| Zhao 2017          | ×  | ?  | +  | +  | +  | ×       |
| Flesch 2017        | +  | +  | ?  | +  | +  | ?       |
| Polakowski 2017    | +  | +  | +  | +  | +  | +       |
| Xie 2018           | ×  | ?  | +  | +  | +  | ×       |
| Xu 2018            | ×  | ?  | +  | +  | +  | ×       |
| Bajramagic 2019    | ×  | ?  | +  | +  | +  | ×       |
| Park 2020          | +  | +  | +  | +  | +  | +       |
| Zeng 2020          | ×  | ?  | +  | +  | +  | ×       |
| Yoon 2020          | +  | +  | +  | +  | +  | +       |
| Fowarski 2021      | +  | ×  | +  | +  | +  | ×       |
| Wang 2021          | +  | +  | +  | +  | +  | +       |

**Supplementary Table S4. Risk of Bias of included studies.** D1: Bias arising from the randomization process. D2: Bias due to deviations from intended intervention. D3: Bias due to missing outcome data. D4: Bias in measurement or the outcome. D5: Bias in selection of the reported result. High? Some concerns Low
