# Supplementary material for: The Efficacy of Probiotics, Prebiotics, and Synbiotics in Patients Who Have Undergone Abdominal Operation, in Terms of Bowel Function Post-Operatively: A Network Meta-Analysis
Source: J Clin Med. 2023 Jun 20;12(12):4150. doi: 10.3390/jcm12124150 (PMC10299319; doi:10.3390/jcm12124150)
Supplement: Supplementary file 1 [file jcm-12-04150-s001.zip]

Archive with 6 entries (6 files):
- Figure S1.pdf
- Table S1-search.pdf
- Table S2- excluded.pdf
- Table S3.pdf
- Table S4-RoB .pdf
- Table S5 GRADE.pdf
