# Supplementary figures and images for: The Efficacy of Probiotics, Prebiotics, and Synbiotics in Patients Who Have Undergone Abdominal Operation, in Terms of Bowel Function Post-Operatively: A Network Meta-Analysis
Source: MDPI journal article supplement (doi:10.3390/jcm12124150), 2023-06-20

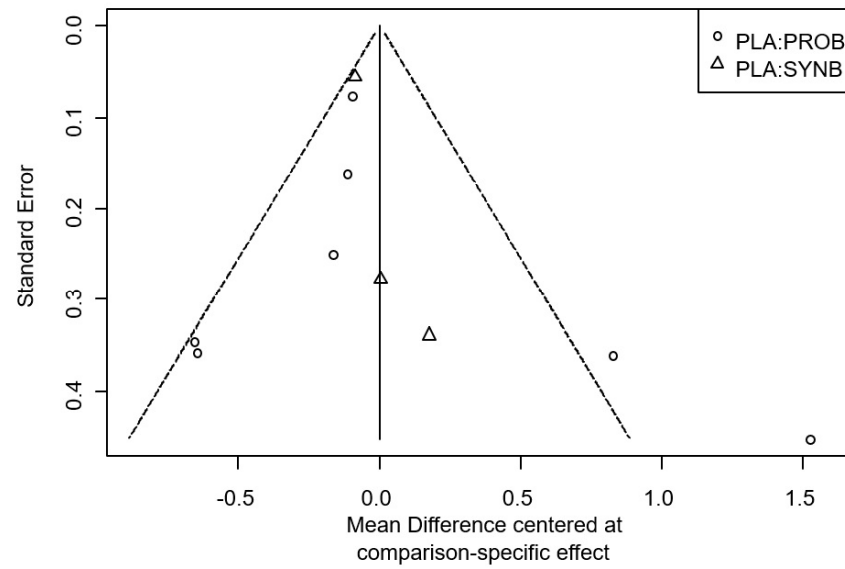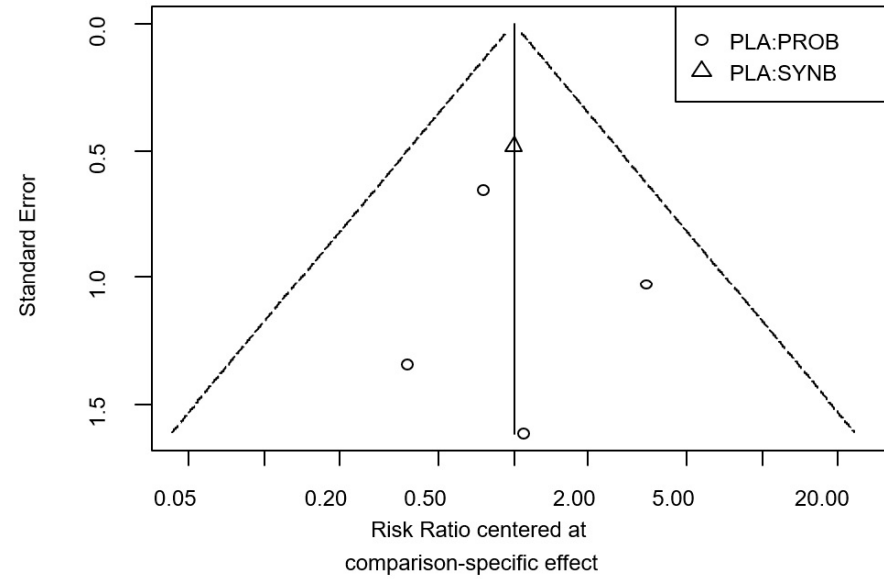

**Supplementary Figure S1. Comparison-adjusted funnel plot.**

Supplement: s1 [file s1]
